# Supplementary material for: Non‐digestible carbohydrates supplementation increases miR‐32 expression in the healthy human colorectal epithelium: A randomized controlled trial
Source: PubMed Central journal article supplement (PMC5573932; doi:10.1002/mc.22666), 2017-05-09
Supplement: MC-56-2104-s001.pdf [file MC-56-2104-s001.pdf]

**Additional File 2**

| <b>Mature ID</b>         | <b>Fold change relative to all reference genes</b> | <b>Fold change relative to RNU-6 and SNORD68</b> | <b>Comments</b> |
|--------------------------|----------------------------------------------------|--------------------------------------------------|-----------------|
| <i>hsa-miR-551a</i>      | 17.15                                              | 18.69                                            | B               |
| <i>hsa-miR-676-5p</i>    | 8.10                                               | 7.58                                             | B               |
| <i>hsa-miR-4251</i>      | 4.25                                               | 3.98                                             | B               |
| <i>hsa-miR-3137</i>      | 4.01                                               | 3.99                                             | B               |
| <i>hsa-miR-621</i>       | 3.73                                               | 3.65                                             | B               |
| <i>hsa-miR-135a-5p</i>   | 3.41                                               | 3.19                                             | OKAY            |
| <i>hsa-miR-3155b</i>     | 3.33                                               | 3.12                                             | B               |
| <i>hsa-miR-488-3p</i>    | 3.07                                               | 3.35                                             | B               |
| <i>hsa-miR-647</i>       | 3.03                                               | 2.96                                             | B               |
| <i>hsa-miR-876-3p</i>    | 2.90                                               | 2.76                                             | B               |
| <i>hsa-miR-3074-3p</i>   | 2.77                                               | 2.59                                             | B               |
| <i>hsa-miR-758-3p</i>    | 2.73                                               | 2.98                                             | B               |
| <i>hsa-miR-517-5p</i>    | 2.56                                               | 2.40                                             | A               |
| <i>hsa-miR-3140-3p</i>   | 2.51                                               | 2.39                                             | B               |
| <i>hsa-miR-3156-5p</i>   | 2.51                                               | 2.35                                             | A               |
| <i>hsa-miR-1914-3p</i>   | 2.49                                               | 2.33                                             | B               |
| <i>hsa-miR-3144-5p</i>   | 2.49                                               | 2.47                                             | B               |
| <i>hsa-miR-875-3p</i>    | 2.45                                               | 2.29                                             | B               |
| <i>hsa-miR-4285</i>      | 2.42                                               | 2.41                                             | B               |
| <i>hsa-miR-936</i>       | 2.41                                               | 2.29                                             | B               |
| <i>hsa-miR-2116-3p</i>   | 2.39                                               | 2.24                                             | B               |
| <i>hsa-miR-3605-3p</i>   | 2.39                                               | 2.37                                             | B               |
| <i>hsa-miR-31-3p</i>     | 2.37                                               | 2.26                                             | B               |
| <i>hsa-miR-541-3p</i>    | 2.36                                               | 2.24                                             | B               |
| <i>hsa-miR-26a-1-3p</i>  | 2.18                                               | 2.36                                             | A               |
| <i>hsa-miR-23a-5p</i>    | 2.18                                               | 2.36                                             | B               |
| <i>hsa-miR-4290</i>      | 2.12                                               | 1.99                                             | B               |
| <i>hsa-miR-3661</i>      | 2.12                                               | 1.99                                             | B               |
| <i>hsa-miR-3158-3p</i>   | 2.10                                               | 1.99                                             | B               |
| <i>hsa-miR-3714</i>      | 2.04                                               | 1.91                                             | A               |
| <i>hsa-miR-125b-1-3p</i> | 2.02                                               | 2.28                                             | B               |
| <i>hsa-miR-499a-5p</i>   | 2.01                                               | 2.17                                             | A               |
| <i>hsa-miR-411-3p</i>    | 2.00                                               | 2.26                                             | B               |

| <b>Mature ID</b>         | <b>Fold change relative to all reference genes</b> | <b>Fold change relative to RNU-6 and SNORD68</b> | <b>Comments</b> |
|--------------------------|----------------------------------------------------|--------------------------------------------------|-----------------|
| <i>hsa-miR-637</i>       | -484.32                                            | -517.18                                          | OKAY            |
| <i>hsa-miR-600</i>       | -27.66                                             | -25.38                                           | A               |
| <i>hsa-miR-133b</i>      | -15.03                                             | -13.79                                           | OKAY            |
| <i>hsa-miR-640</i>       | -11.08                                             | -12.21                                           | A               |
| <i>hsa-miR-1537-3p</i>   | -6.56                                              | -6.89                                            | B               |
| <i>hsa-miR-206</i>       | -6.41                                              | -5.88                                            | B               |
| <i>hsa-miR-3117-3p</i>   | -6.19                                              | -6.52                                            | B               |
| <i>hsa-miR-516b-5p</i>   | -5.42                                              | -4.80                                            | B               |
| <i>hsa-miR-512-3p</i>    | -4.79                                              | -4.39                                            | B               |
| <i>hsa-miR-130a-5p</i>   | -4.56                                              | -4.80                                            | B               |
| <i>hsa-miR-1287-5p</i>   | -3.99                                              | -3.55                                            | OKAY            |
| <i>hsa-miR-1205</i>      | -3.99                                              | -3.55                                            | B               |
| <i>hsa-miR-4326</i>      | -3.81                                              | -4.20                                            | B               |
| <i>hsa-miR-509-5p</i>    | -3.78                                              | -3.34                                            | B               |
| <i>hsa-miR-105-5p</i>    | -3.73                                              | -3.98                                            | B               |
| <i>hsa-miR-127-3p</i>    | -3.53                                              | -3.24                                            | OKAY            |
| <i>hsa-miR-1323</i>      | -3.49                                              | -3.11                                            | B               |
| <i>hsa-miR-373-3p</i>    | -3.39                                              | -3.62                                            | B               |
| <i>hsa-miR-135b-3p</i>   | -3.35                                              | -2.98                                            | B               |
| <i>hsa-miR-449b-5p</i>   | -3.28                                              | -2.92                                            | B               |
| <i>hsa-miR-643</i>       | -3.27                                              | -3.35                                            | B               |
| <i>hsa-miR-3186-3p</i>   | -3.25                                              | -3.58                                            | B               |
| <i>hsa-miR-4304</i>      | -3.20                                              | -3.53                                            | B               |
| <i>hsa-miR-383-5p</i>    | -3.18                                              | -3.40                                            | B               |
| <i>hsa-miR-1911-3p</i>   | -3.12                                              | -3.28                                            | B               |
| <i>hsa-miR-3143</i>      | -2.99                                              | -3.15                                            | B               |
| <i>hsa-miR-3918</i>      | -2.93                                              | -3.23                                            | B               |
| <i>hsa-miR-3654</i>      | -2.87                                              | -3.16                                            | A               |
| <i>hsa-miR-181a-2-3p</i> | -2.84                                              | -2.63                                            | A               |
| <i>hsa-miR-548b-3p</i>   | -2.83                                              | -2.89                                            | B               |
| <i>hsa-miR-573</i>       | -2.82                                              | -2.96                                            | OKAY            |
| <i>hsa-miR-619-3p</i>    | -2.79                                              | -2.56                                            | B               |
| <i>hsa-miR-630</i>       | -2.77                                              | -2.54                                            | B               |
| <i>hsa-miR-2115-5p</i>   | -2.72                                              | -2.52                                            | B               |
| <i>hsa-miR-509-3p</i>    | -2.70                                              | -2.72                                            | B               |
| <i>hsa-miR-3200-5p</i>   | -2.67                                              | -2.95                                            | OKAY            |
| <i>hsa-miR-767-5p</i>    | -2.60                                              | -2.78                                            | B               |
| <i>hsa-miR-518f-5p</i>   | -2.51                                              | -2.68                                            | B               |
| <i>hsa-miR-873-5p</i>    | -2.51                                              | -2.68                                            | B               |
| <i>hsa-miR-1273d</i>     | -2.50                                              | -2.75                                            | A               |
| <i>hsa-miR-524-3p</i>    | -2.44                                              | -2.24                                            | B               |

|                        |       |       |      |
|------------------------|-------|-------|------|
| <i>hsa-miR-144-3p</i>  | -2.43 | -2.24 | OKAY |
| <i>hsa-miR-3939</i>    | -2.40 | -2.52 | B    |
| <i>hsa-miR-548t-3p</i> | -2.38 | -2.62 | A    |
| <i>hsa-miR-4261</i>    | -2.38 | -2.62 | B    |
| <i>hsa-miR-412-3p</i>  | -2.36 | -2.17 | B    |
| <i>hsa-miR-211-5p</i>  | -2.33 | -2.38 | B    |
| <i>hsa-miR-377-3p</i>  | -2.33 | -2.57 | A    |
| <i>hsa-miR-4257</i>    | -2.31 | -2.43 | B    |
| <i>hsa-miR-4253</i>    | -2.31 | -2.43 | B    |
| <i>hsa-miR-639</i>     | -2.30 | -2.11 | B    |
| <i>hsa-miR-1266-5p</i> | -2.26 | -2.09 | B    |
| <i>hsa-miR-34b-3p</i>  | -2.26 | -2.01 | B    |
| <i>hsa-miR-1299</i>    | -2.24 | -2.00 | A    |
| <i>hsa-miR-297</i>     | -2.23 | -1.98 | B    |
| <i>hsa-miR-3617-5p</i> | -2.21 | -2.36 | B    |
| <i>hsa-miR-3917</i>    | -2.20 | -2.32 | B    |
| <i>hsa-miR-3142</i>    | -2.20 | -2.32 | B    |
| <i>hsa-miR-668-3p</i>  | -2.19 | -2.30 | B    |
| <i>hsa-miR-323b-5p</i> | -2.18 | -2.02 | B    |
| <i>hsa-miR-485-5p</i>  | -2.18 | -1.94 | A    |
| <i>hsa-miR-3692-3p</i> | -2.14 | -2.26 | B    |
| <i>hsa-miR-1262</i>    | -2.14 | -1.98 | B    |
| <i>hsa-miR-3922-3p</i> | -2.13 | -2.24 | B    |
| <i>hsa-miR-623</i>     | -2.11 | -2.26 | B    |
| <i>hsa-miR-487a-3p</i> | -2.11 | -1.94 | A    |
| <i>hsa-miR-582-3p</i>  | -2.10 | -2.25 | B    |
| <i>hsa-miR-3605-5p</i> | -2.10 | -2.21 | B    |
| <i>hsa-miR-3160-3p</i> | -2.09 | -2.10 | B    |
| <i>hsa-miR-511-5p</i>  | -2.09 | -2.13 | OKAY |
| <i>hsa-miR-1914-5p</i> | -2.09 | -2.19 | A    |
| <i>hsa-miR-3182</i>    | -2.08 | -2.30 | A    |
| <i>hsa-miR-32-5p</i>   | -2.07 | -1.91 | OKAY |
| <i>hsa-miR-302c-3p</i> | -2.06 | -1.90 | B    |
| <i>hsa-miR-380-5p</i>  | -2.05 | -1.82 | B    |
| <i>hsa-miR-1276</i>    | -2.04 | -1.88 | A    |
| <i>hsa-miR-514a-3p</i> | -2.02 | -2.06 | B    |
| <i>hsa-let-7f-1-3p</i> | -2.01 | -1.78 | OKAY |
